# Supplementary material for: The U.S. COVID-19 County Policy Database: a novel resource to support pandemic-related research
Source: Springer Nature journal article supplement (doi:10.1186/s12889-022-14132-6), 2022-10-10

## **SUPPLEMENTAL METHODS**

### *County Selection*

The goal of the parent project for this study was to link county policy data to health outcomes derived from health systems participating in the National Patient Centered Outcomes Research Network (PCORnet) Common Data Model[1] and patient-reported outcomes from the Eureka COVID-19 Citizen Science study (CCS).[2] Thus, while there are over 3,000 counties in the U.S., this first wave of data collection for the U.S. COVID-19 County Policy (UCCP) Database focused on counties that corresponded to the places of residence for PCORnet and CCS patients. Data collection for the UCCP Database is ongoing and it will eventually include additional time points for 2020–2021 and additional counties nationwide in all 50 states and Washington, D.C.

While public health policymaking may occur at other geographic levels, e.g., cities; local public health departments in the U.S. are almost always situated within county governments, which is why we focused data collection at this level. There are a few exceptions, e.g., in Massachusetts, public health initiatives occur at the municipality level; note that Massachusetts was not included in this sample. In cases where we were unable to locate information for a given policy at the county level, we also checked whether the largest city within that county had implemented any relevant policies (as long as the city’s population made up at least 51% of the county’s population).

### *Data Collection*

For each policy, data collectors abstracted the scoring, the date of data collection, and source documentation. This included the source’s URL as well as a PDF of the source to capture information in real time given the potential for website content to change. These sources are

available in the online data repository for this paper at openICPSR (see main manuscript for link to data repository).

Prior to the start of data collection, research staff received training and were assigned a subset of counties on which to gather policy data. The study team developed documentation to serve as a guide for data collectors. This documentation provided detailed guidance for each policy to enhance consistency in coding of nuances encountered. For example, if public events were banned but an exception was granted for one large event with social distancing, the public events policy indicator would be scored as “require cancelling.” The training documentation also reflected general guidance on how to handle instances in which source materials on government websites were outdated or undated, and instances in which a county deferred to or referenced state policy. A central file was maintained through which data collectors posed questions, for adjudication by the study leads. Training materials were updated regularly to reflect additional guidance related to adjudication questions. The lead data collector also conducted weekly random checks of a subset of data collection points to provide feedback to individual data collectors and to review in team meetings. For the longitudinal data collection that is currently ongoing for the UCCP Database, we are carrying out double data entry of 10% of entries to evaluate inter-rater reliability.

Note that future investigators may choose to rank the comprehensiveness of categories differently than how we did so for the present study. For example, for public events, we decided that minimal ( $\geq 50\%$  capacity) limitations and major ( $< 50\%$  capacity) limitations were less comprehensive than a recommended cancellation, since there was still an implication that events could proceed as scheduled. However, future researchers may decide that the capacity limitations were more restrictive because they had enforceable limits rather than representing simply a

“recommendation.” Interested researchers can therefore re-order these categories in the raw data that we provide in the online data repository.

### *Principal Components Analysis*

PCA is commonly used as an unsupervised machine learning technique to reduce the dimensionality of large data sets. In essence, it creates multiple sets of weighted averages of each of the policies, producing principal components that explain the most variance in the data. Because the policy indicators are categorical, we specifically used polychoric PCA to account for the discrete and ordinal data structure, as standard PCA is intended for use with continuous variables.[3, 4]

The scree plot in Supplemental Figure 3 shows that after the fourth component, eigenvalues dropped dramatically, and the additional information added by the next component was very small. We therefore used four principal components as they explained 79% of the variation in policies. Supplemental Tables 6 and 7 show the first four components of the orthogonally rotated principal components and which factors they loaded, respectively. As seen in Supplemental Table 6, the first principal component explained 35% of the total variance, the second 20%, the third 16%, and the fourth 8%. According to Supplemental Table 7, the first principal component mostly loaded on variables that define entity closures such as closings of schools, workplaces, bars, and religious places. The second principal component mostly loaded on restrictions for individuals, such as restrictions to private gatherings, nursing homes, and curfew requirements. The third component mostly loaded on policies that required state funding, such as housing and utility support, public information campaigns, and contact tracing. Finally, the fourth component mostly loaded on policies related to public health measures such as testing and vaccination policies.

Finally, we created a composite index by adding all four of the principal components to measure the degree of policy comprehensiveness. Geographic distributions of the four individual principal components and the composite index that sums these four components are included in Supplemental Figures 4a-4e.

## **SUPPLEMENTAL RESULTS**

### *Analyses Without Imputation Using State Data*

For containment and closure policies, when using data from county sources only, without imputation of missing values using state data, patterns were similar to the main analysis, but with more missingness (Supplemental Table 3, Panel A). For economic response policies, values for housing support and utility relief were 34.5% and 26.9%, respectively, indicating that economic response policies were primarily implemented by states (Supplemental Table 3, Panel B). For public health policies, 40.9% were missing policy documentation for contact tracing and 17.5% for testing and facial coverings, again suggesting that states were more active than counties in implementing these policies (Supplemental Table 3, Panel C).

When examining cross-state geographic variation in county-level COVID-19-related policies (Supplemental Table 5), there was more variation than in the main analysis, with fewer policies passed in Louisiana, Mississippi, and Utah. This may be due in part to the fact that these states had higher levels of missingness at the county level (Supplemental Table 4). For example, using these unimputed data, the number of economic response policies for each of these states was 0.1, 0.0, and 0.1, respectively. This indicates that there was more policymaking happening at the state level in these locations.

When examining geographic variation in county policies within states (Supplemental Figure 1), the variation across states again became more pronounced. California, New Jersey, and New York had a greater number of policies across counties, with most in the top tertile. Meanwhile, Louisiana, Mississippi, Texas, and Utah had more counties in the bottom tertile. As above, this suggests the relative importance of state-level policymaking in some states. Only the county of Falls, Texas, had no policy restrictions or policy documentation of any kind.

#### SUPPLEMENTAL REFERENCES

1. Forrest CB, McTigue KM, Hernandez AF, Cohen LW, Cruz H, Haynes K, Kaushal R, Kho AN, Marsolo KA, Nair VP *et al*: **PCORnet® 2020: current state, accomplishments, and future directions.** *Journal of clinical epidemiology* 2021, **129**:60-67.
2. Beatty AL, Peyser ND, Butcher XE, Carton TW, Olgin JE, Pletcher MJ, Marcus GM: **The COVID-19 Citizen Science Study: Protocol for a Longitudinal Digital Health Cohort Study.** *JMIR Research Protocols* 2021, **10**(8):e28169.
3. Martel P, Mbofana F, Cousens S: **The polychoric dual-component wealth index as an alternative to the DHS index: Addressing the urban bias.** *Journal of Global Health* 2021, **11**.
4. Kolenikov S, Angeles G: **Socioeconomic status measurement with discrete proxy variables: Is principal component analysis a reliable answer?** *Review of Income and Wealth* 2009, **55**(1):128-165.

**Supplemental Table 1. List of Counties for Which Policy Data Were Collected, by State**

| <b>California</b> | <b>Louisiana</b>     | <b>Mississippi</b> | <b>New Jersey</b> | <b>New York</b> | <b>Texas</b> | <b>Utah</b> |
|-------------------|----------------------|--------------------|-------------------|-----------------|--------------|-------------|
| Alameda           | Ascension            | Hancock            | Bergen            | Bronx           | Austin       | Beaver      |
| Amador            | Assumption           | Harrison           | Essex             | Dutchess        | Bastrop      | Box Elder   |
| Butte             | Bossier              | Jackson            | Hudson            | Essex           | Bell         | Cache       |
| Contra Costa      | Caddo                | Pearl River        | Mercer            | Kings           | Bexar        | Carbon      |
| Del Norte         | Calcasieu            |                    | Middlesex         | Nassau          | Blanco       | Daggett     |
| El Dorado         | De Soto              |                    | Monmouth          | New York        | Bosque       | Davis       |
| Fresno            | East Baton Rouge     |                    | Morris            | Orange          | Brazos       | Duchesne    |
| Humboldt          | East Feliciana       |                    | Ocean             | Putnam          | Burleson     | Emery       |
| Lake              | Iberville            |                    | Passaic           | Queens          | Burnet       | Garfield    |
| Los Angeles       | Jefferson            |                    | Somerset          | Richmond        | Collin       | Grand       |
| Marin             | Lafayette            |                    | Union             | Rockland        | Cooke        | Iron        |
| Mendocino         | Lafourche            |                    |                   | Suffolk         | Coryell      | Juab        |
| Merced            | Lincoln              |                    |                   | Ulster          | Dallas       | Kane        |
| Monterey          | Livingston           |                    |                   | Westchester     | Denton       | Millard     |
| Napa              | Orleans              |                    |                   |                 | Ellis        | Morgan      |
| Nevada            | Ouachita             |                    |                   |                 | Falls        | Piute       |
| Placer            | Plaquemines          |                    |                   |                 | Fannin       | Rich        |
| Sacramento        | Rapides              |                    |                   |                 | Fayette      | Salt Lake   |
| San Diego         | St. Bernard          |                    |                   |                 | Freestone    | San Juan    |
| San Francisco     | St. Charles          |                    |                   |                 | Grayson      | Sanpete     |
| San Joaquin       | St. James            |                    |                   |                 | Grimes       | Sevier      |
| San Luis Obispo   | St. John the Baptist |                    |                   |                 | Hamilton     | Summit      |
| San Mateo         | St. Mary             |                    |                   |                 | Harris       | Tooele      |
| Santa Clara       | St. Tammany          |                    |                   |                 | Hays         | Uintah      |
| Santa Cruz        | Tangipahoa           |                    |                   |                 | Henderson    | Utah        |
| Shasta            | Terrebonne           |                    |                   |                 | Hill         | Wasatch     |
| Solano            | Washington           |                    |                   |                 | Hood         | Washington  |
| Sonoma            | Webster              |                    |                   |                 | Hunt         | Wayne       |
| Stanislaus        | West Baton Rouge     |                    |                   |                 | Johnson      | Weber       |
| Sutter            |                      |                    |                   |                 | Kaufman      |             |
| Tulare            |                      |                    |                   |                 | Lampasas     |             |
| Tuolumne          |                      |                    |                   |                 | Lee          |             |
| Yolo              |                      |                    |                   |                 | Leon         |             |
| Yuba              |                      |                    |                   |                 | Limestone    |             |
|                   |                      |                    |                   |                 | Llano        |             |
|                   |                      |                    |                   |                 | McLennan     |             |
|                   |                      |                    |                   |                 | Milam        |             |
|                   |                      |                    |                   |                 | Montgomery   |             |
|                   |                      |                    |                   |                 | Navarro      |             |
|                   |                      |                    |                   |                 | Parker       |             |
|                   |                      |                    |                   |                 | Robertson    |             |
|                   |                      |                    |                   |                 | Rockwall     |             |

(continued on next page)

San Saba

Tarrant

Travis

Van Zandt

Waller

Washington

Williamson

Wise

---

Note: Counties are not intended to be a representative sample of U.S. counties, but rather were selected for the purposes of linkage with health outcomes from the National Patient Centered Outcomes Research Network (PCORnet) Common Data Model and patient-reported outcomes from the Eureka COVID Citizen Science Study (CCS). The total population of these counties is over 90.4 million individuals.

**Supplemental Table 2. Scoring Criteria for Policies Included in the Study**

| <b>Policy</b>                                    | <i>Least comprehensive</i>  <i>Most comprehensive</i> |                                                                                                                                     |                                                                                                        |                                                                                                                  |                                                     |  |
|--------------------------------------------------|-----------------------------------------------------------------------------------------------------------------------------------------|-------------------------------------------------------------------------------------------------------------------------------------|--------------------------------------------------------------------------------------------------------|------------------------------------------------------------------------------------------------------------------|-----------------------------------------------------|--|
| <b>Panel A. Containment and Closure Policies</b> |                                                                                                                                         |                                                                                                                                     |                                                                                                        |                                                                                                                  |                                                     |  |
| School Closing                                   | 0 - No measures (i.e., no restrictions)                                                                                                 | 1 - Recommend closing or all schools open with alterations resulting in significant differences compared to non-COVID-19 operations | 2 - Require closing (only some levels or categories - e.g., just high school)                          | 3 - Require closing all levels                                                                                   |                                                     |  |
| Workplace Closing                                | 0 - No measures (i.e., no restrictions)                                                                                                 | 1 - Recommend closing (or recommend work from home)                                                                                 | 2 - Require closing (or work from home) for some sectors or categories of non-essential office workers | 3 - Require closing (or work from home) all-but-essential workplaces (e.g., grocery stores, doctors, pharmacies) |                                                     |  |
| Cancel Public Events                             | 0 - No measures (i.e., no restrictions)                                                                                                 | 1 - Events allowed, with minimal ( $\geq 50\%$ capacity) limitations                                                                | 2 - Events allowed, with major ( $< 50\%$ capacity) limitations                                        | 3 - Recommend cancelling                                                                                         | 4 - Require cancelling                              |  |
| Restrictions on Private Gatherings               | 0 - No restrictions                                                                                                                     | 1 - Restrictions on very large gatherings (the limit is above 1000 people)                                                          | 2 - Restrictions on gatherings between 101-1000 people                                                 | 3 - Restrictions on gatherings between 11-100 people                                                             | 4 - Restrictions on gatherings of 10 people or less |  |
| Close Public Transport                           | 0 - No measures (i.e., no restrictions)                                                                                                 | 1 - Recommend closing (or significantly reduce volume/route/means of transport available)                                           | 2 - Require closing (or prohibit most from using it)                                                   |                                                                                                                  |                                                     |  |
| Stay at Home Requirements                        | 0 - No measures (i.e., no restrictions)                                                                                                 | 1 - Recommend not leaving house                                                                                                     | 2 - Require not leaving house with exceptions for daily exercise, grocery                              | 3 - Require not leaving house with minimal exceptions (e.g., allowed to leave only once a                        |                                                     |  |



|                                      |                                         |                                                                                                                                       |                                                                           |                                                     |                           |            |
|--------------------------------------|-----------------------------------------|---------------------------------------------------------------------------------------------------------------------------------------|---------------------------------------------------------------------------|-----------------------------------------------------|---------------------------|------------|
|                                      |                                         |                                                                                                                                       | shopping, and 'essential' trips                                           | week, or only one person can leave at a time)       |                           |            |
| Gym Closing                          | 0 - No measures (i.e., no restrictions) | 1 - Open, with minimal ( $\geq 50\%$ capacity) limitations                                                                            | 2 - Open, with major ( $< 50\%$ capacity) limitations                     | 3 - Closed                                          |                           |            |
| Restaurant Closing                   | 0 - No measures (i.e., no restrictions) | 1 - Open for indoor dining, with minimal ( $\geq 50\%$ capacity) limitations                                                          | 2 - Open for indoor dining, with major ( $< 50\%$ capacity) limitations   | 3 - Outdoor only (with or without takeout/delivery) | 4 - Takeout/delivery only | 5 - Closed |
| Bar Closing                          | 0 - No measures (i.e., no restrictions) | 1 - Open for indoor drinking, with minimal ( $\geq 50\%$ capacity) limitations                                                        | 2 - Open for indoor drinking, with major ( $< 50\%$ capacity) limitations | 3 - Outdoor only (with or without takeout/delivery) | 4 - Takeout/delivery only | 5 - Closed |
| Movie Theater Closing                | 0 - No measures (i.e., no restrictions) | 1 - Open, with minimal ( $\geq 50\%$ capacity) limitations                                                                            | 2 - Open, with major ( $< 50\%$ capacity) limitations                     | 3 - Closed                                          |                           |            |
| Childcare Closing                    | 0 - No measures (i.e., no restrictions) | 1 - Recommend closing or all day cares open with alterations resulting in significant differences compared to non-COVID-19 operations | 2 - Require closing (only some levels or categories - e.g., babies)       | 3 - Require closing all levels                      |                           |            |
| Hair Salon/Barber Shop Closing       | 0 - No measures (i.e., no restrictions) | 1 - Open, with minimal ( $\geq 50\%$ capacity) limitations                                                                            | 2 - Open, with major ( $< 50\%$ capacity) limitations                     | 3 - Closed                                          |                           |            |
| Restrictions on Religious Gatherings | 0 - No measures (i.e., no restrictions) | 1 - Open, with minimal ( $\geq 50\%$ capacity) limitations                                                                            | 2 - Open, with major ( $< 50\%$ capacity) limitations                     | 3 - Closed                                          |                           |            |
| Nursing Home Visitation Restrictions | 0 - No measures (i.e., no restrictions) | 1 - Visitation with limitations                                                                                                       | 2 - Visitation ban                                                        |                                                     |                           |            |
| Curfew Requirement                   | 0 - No measures (i.e., no restrictions) | 1 - Required                                                                                                                          |                                                                           |                                                     |                           |            |

| Panel B. Economic Support Policies |                                             |                                                                                                                                                                                       |                                                                                                                                                                      |                                                                                                                                                         |                                                                                               |                            |
|------------------------------------|---------------------------------------------|---------------------------------------------------------------------------------------------------------------------------------------------------------------------------------------|----------------------------------------------------------------------------------------------------------------------------------------------------------------------|---------------------------------------------------------------------------------------------------------------------------------------------------------|-----------------------------------------------------------------------------------------------|----------------------------|
| Housing Financial Support          | 0 - No measures (i.e., no support)          | 1 - Support                                                                                                                                                                           |                                                                                                                                                                      |                                                                                                                                                         |                                                                                               |                            |
| Utility Support                    | 0 - No measures (i.e., no support)          | 1 - Support                                                                                                                                                                           |                                                                                                                                                                      |                                                                                                                                                         |                                                                                               |                            |
| Panel C. Public Health Policies    |                                             |                                                                                                                                                                                       |                                                                                                                                                                      |                                                                                                                                                         |                                                                                               |                            |
| Public Information Campaigns       | 0 - No COVID-19 public information campaign | 1 - Public officials urging caution about COVID-19                                                                                                                                    | 2 - Coordinated public information campaign (e.g., across traditional and social media)                                                                              |                                                                                                                                                         |                                                                                               |                            |
| Testing Policy                     | 0 - No testing policy                       | 1 - Only those who both (a) have symptoms AND (b) meet specific criteria (e.g., essential workers, admitted to hospital, came into contact with a known case, returned from overseas) | 2 - Testing of anyone showing COVID-19 symptoms                                                                                                                      | 3 - Open public testing (e.g., “drive-through” testing available to asymptomatic people)                                                                |                                                                                               |                            |
| Contact Tracing                    | 0 - No contact tracing                      | 1 - Limited contact tracing (not done for all cases)                                                                                                                                  | 2 - Comprehensive contact tracing (done for all identified cases)                                                                                                    |                                                                                                                                                         |                                                                                               |                            |
| Facial Coverings                   | 0 - No policy                               | 1 - Recommended                                                                                                                                                                       | 2 - Required in <b>some</b> specified shared/public spaces outside the home with other people present, or <b>some</b> situations when social distancing not possible | 3 - Required in <b>all</b> shared/public spaces outside the home with other people present or <b>all</b> situations when social distancing not possible | 4 - Required outside the home at all times regardless of location or presence of other people |                            |
| Vaccination Policy                 | 0 - No availability                         | 1 - Availability for <b>ONE</b> of following:                                                                                                                                         | 2 - Availability for <b>TWO</b> of following:                                                                                                                        | 3 - Availability for <b>ALL</b> of following:                                                                                                           | 4 - Availability for all three plus partial                                                   | 5 - Universal availability |

|  |  |                                                                                       |                                                                                       |                                                                                       |                                                          |  |
|--|--|---------------------------------------------------------------------------------------|---------------------------------------------------------------------------------------|---------------------------------------------------------------------------------------|----------------------------------------------------------|--|
|  |  | essential workers/<br>clinically or socially<br>vulnerable groups /<br>elderly groups | essential workers/<br>clinically or socially<br>vulnerable groups /<br>elderly groups | essential workers/<br>clinically or socially<br>vulnerable groups /<br>elderly groups | additional<br>availability (select<br>broad groups/ages) |  |
|--|--|---------------------------------------------------------------------------------------|---------------------------------------------------------------------------------------|---------------------------------------------------------------------------------------|----------------------------------------------------------|--|

Note: For each policy, there was also a category to indicate that there is no information available to determine policy in place.

**Supplemental Table 3. Comprehensiveness of County-level Policies, by Domain, No Imputation Using State Data (January-March 2021)**

| Panel A. Containment and Closure Policies | No policy documented | No restrictions | 1: Least comprehensive | 2     | 3     | 4: Most comprehensive |
|-------------------------------------------|----------------------|-----------------|------------------------|-------|-------|-----------------------|
| School closing                            | 4.7%                 | 1.2%            | 71.3%                  | 15.2% | 7.6%  | -                     |
| Workplace closing                         | 24.0%                | 1.8%            | 52.0%                  | 2.9%  | 19.3% | -                     |
| Cancel public events                      | 26.3%                | 0.0%            | 15.8%                  | 16.4% | 22.2% | 19.3%                 |
| Restrictions on private gatherings        | 29.8%                | 0.6%            | 0.6%                   | 0.6%  | 24.0% | 44.4%                 |
| Close public transport                    | 41.5%                | 36.3%           | 21.1%                  | 1.2%  | -     | -                     |
| Stay at home requirements                 | 31.6%                | 7.0%            | 41.5%                  | 19.9% | -     | -                     |
| Gym closing                               | 23.4%                | 3.5%            | 42.7%                  | 10.5% | 19.9% | -                     |
| Restaurant closing                        | 21.1%                | 0.6%            | 48.5%                  | 4.7%  | 15.8% | 9.4%                  |
| Bar closing                               | 18.1%                | 1.2%            | 27.5%                  | 4.1%  | 12.9% | 36.3%                 |
| Movie theater closing                     | 25.7%                | 0.0%            | 42.7%                  | 5.8%  | 25.7% | -                     |
| Day care closing                          | 38.6%                | 4.1%            | 56.7%                  | 0.6%  | -     | -                     |
| Hair salon/barber shop closing            | 25.1%                | 43.3%           | 17.5%                  | 4.7%  | 9.4%  | -                     |
| Restrictions on religious gatherings      | 22.8%                | 35.7%           | 11.7%                  | 29.8% | -     | -                     |
| Nursing home visitation restrictions      | 51.5%                | 2.9%            | 41.5%                  | 4.1%  | -     | -                     |
| Curfew requirement                        | 49.1%                | 17.5%           | 33.3%                  | -     | -     | -                     |
| Panel B. Economic Response Polices        | No policy documented | No support      | Policy present         |       |       |                       |
| Housing financial support                 | 42.7%                | 22.8%           | 34.5%                  | -     | -     | -                     |
| Utility support                           | 50.3%                | 22.8%           | 26.9%                  | -     | -     | -                     |
| Public Health Policies                    | No policy documented | No policy       | 1: Least comprehensive | 2     | 3     | 4: Most comprehensive |
| Public information campaigns              | 0.6%                 | 11.7%           | 17.5%                  | 70.2% | -     | -                     |
| Testing policy                            | 17.5%                | 1.8%            | 1.2%                   | 6.4%  | 73.1% | -                     |
| Contact tracing                           | 40.9%                | 2.9%            | 19.3%                  | 36.8% | -     | -                     |
| Facial coverings                          | 17.5%                | 0.6%            | 11.1%                  | 15.8% | 55.0% | -                     |
| Vaccination policy                        | 8.2%                 | 1.2%            | 5.8%                   | 24.0% | 56.7% | 4.1%                  |

Note: N = 171 counties in 7 states. Different policies have different numbers of possible categories, and dashes “-” indicate that a given category was not relevant or coded for a given policy. For counties with missing data on a given policy, data from state policies was not used to infer local county policies.

**Supplemental Table 4. Percent Missing Values Across All County Policies, by State and Rural/Urban Status**

| <i>State</i>   | <i>Percent Missing</i> |       |
|----------------|------------------------|-------|
|                | Urban                  | Rural |
| California     | 6.7                    | 13.6  |
| Louisiana      | 54.7                   | 22.7  |
| Mississippi    | 63.6                   | 77.3  |
| New Jersey     | 20.7                   | 0.0   |
| New York       | 0.7                    | 0.0   |
| Texas          | 15.8                   | 22.5  |
| Utah           | 37.9                   | 65.2  |
| <i>Overall</i> | 23.8                   | 39.9  |

Note: N = 171 counties in 7 states. Data were collected for 22 county-level policies, and the values above represent percent missingness across all policies.

**Supplemental Table 5. Mean Number of County Policies, by Policy Domain and State, No Imputation Using State Data (January-March 2021)**

| <i>Policy domain (range)</i>             | CA             | LA            | MS            | NJ             | NY             | TX             | UT            | Overall        |
|------------------------------------------|----------------|---------------|---------------|----------------|----------------|----------------|---------------|----------------|
| Containment/closure (0-15)               | 13.1           | 7.2           | 3.3           | 10.0           | 13.9           | 9.1            | 4.5           | 9.1            |
| Economic response (0-2)                  | 0.8            | 0.1           | 0.0           | 1.2            | 1.1            | 0.8            | 0.1           | 0.6            |
| Public health (0-5)                      | 4.6            | 2.3           | 2.8           | 4.9            | 4.9            | 4.5            | 3.3           | 4.0            |
| Total number of policies (0-22) $\pm$ SD | 18.5 $\pm$ 2.2 | 9.7 $\pm$ 6.7 | 6.0 $\pm$ 5.4 | 16.1 $\pm$ 3.6 | 20.0 $\pm$ 1.6 | 14.4 $\pm$ 3.4 | 7.9 $\pm$ 5.4 | 13.7 $\pm$ 6.0 |
| Number of counties                       | 34             | 29            | 4             | 11             | 14             | 50             | 29            | 171            |

Note: N = 171 counties in 7 states. SD = standard deviation. For counties with missing data on a given policy, data from state policies were used to infer local county policies.

**Supplemental Table 6. Summary of principal components**

| <i>Component</i> | <i>Variance</i> | <i>Proportion of variance</i> | <i>Cumulative proportion</i> |
|------------------|-----------------|-------------------------------|------------------------------|
| Component 1      | 7.60            | 0.35                          | 0.35                         |
| Component 2      | 4.41            | 0.20                          | 0.55                         |
| Component 3      | 3.58            | 0.16                          | 0.71                         |
| Component 4      | 1.85            | 0.08                          | 0.79                         |

**Supplemental Table 7. Loadings of rotated components**

| <i>Variable</i>                      | <i>Component 1</i> | <i>Component 2</i> | <i>Component 3</i> | <i>Component 4</i> |
|--------------------------------------|--------------------|--------------------|--------------------|--------------------|
| School closing                       | 0.37               | -                  | -                  | -                  |
| Workplace closing                    | 0.37               | -                  | -                  | -                  |
| Cancel public events                 | -                  | -                  | -                  | -                  |
| Restrictions on private gatherings   | -                  | 0.48               | -                  | -                  |
| Close public transport               | -                  | -                  | -                  | -                  |
| Stay at home requirements            | -                  | -                  | -                  | -                  |
| Gym closing                          | 0.33               | -                  | -                  | -                  |
| Restaurant closing                   | -                  | -                  | -                  | -                  |
| Bar closing                          | 0.36               | -                  | -                  | -                  |
| Movie theatre closing                | -                  | -                  | -                  | -                  |
| Childcare closing                    | -                  | -                  | -                  | -                  |
| Hair salon/barber shop closing       | -                  | 0.33               | -                  | -                  |
| Restrictions on religious gatherings | 0.36               | -                  | -                  | -                  |
| Nursing home visitation restrictions | -                  | 0.43               | -                  | -                  |
| Curfew requirement                   | -                  | 0.46               | -                  | -                  |
| Housing financial support            | -                  | -                  | 0.47               | -                  |
| Utility support                      | -                  | -                  | 0.58               | -                  |
| Public information campaigns         | -                  | -                  | 0.35               | -                  |
| Testing policy                       | -                  | -                  | -                  | 0.39               |
| Contact tracing                      | -                  | -                  | 0.35               | -                  |
| Facial coverings                     | -                  | -                  | -                  | -                  |
| Vaccination policy                   | -                  | -                  | -                  | 0.65               |

Note: Blank spaces represent absolute loadings that are less than 0.3.

**Supplemental Table 8. Summary statistics of PCA-derived indices by state**

| Component                          | California |       | Louisiana |      | Mississippi |      | New Jersey |      | New York |      | Texas |      | Utah  |      |
|------------------------------------|------------|-------|-----------|------|-------------|------|------------|------|----------|------|-------|------|-------|------|
|                                    | Mean       | SD    | Mean      | SD   | Mean        | SD   | Mean       | SD   | Mean     | SD   | Mean  | SD   | Mean  | SD   |
| Entity closure index (PC1)         | 10.08      | -1.04 | 3.27      | 2.49 | 1.74        | 1.93 | 5.83       | 1.54 | 8.11     | 0.98 | 4.90  | 1.40 | 2.50  | 1.86 |
| Individual restriction index (PC2) | 0.31       | 0.92  | 0.32      | 0.89 | 2.03        | 0.14 | 1.95       | 0.90 | 1.44     | 0.49 | 2.41  | 0.81 | 1.75  | 0.88 |
| State funding index (PC3)          | -3.75      | 1.22  | -1.61     | 0.85 | -1.45       | 0.32 | -1.23      | 0.74 | -0.88    | 0.50 | -2.04 | 1.17 | -1.02 | 0.60 |
| Public health index (PC4)          | 1.68       | 0.58  | 1.30      | 1.29 | 1.89        | 1.14 | 1.55       | 0.85 | 2.63     | 0.72 | 2.13  | 0.99 | 1.16  | 1.15 |
| Composite index                    | 8.32       | 1.87  | 3.29      | 3.07 | 4.20        | 3.31 | 8.10       | 1.72 | 11.30    | 1.08 | 7.40  | 2.94 | 4.39  | 3.02 |

Note: Higher levels indicate stronger or more comprehensive policies for a given index.

PC = principal component; PCA = principal component analysis; SD = standard deviation.



**Supplemental Figure 1. Distribution of Number of County Policies by State, No Imputation Using State Data (January-March 2021)**

**California**

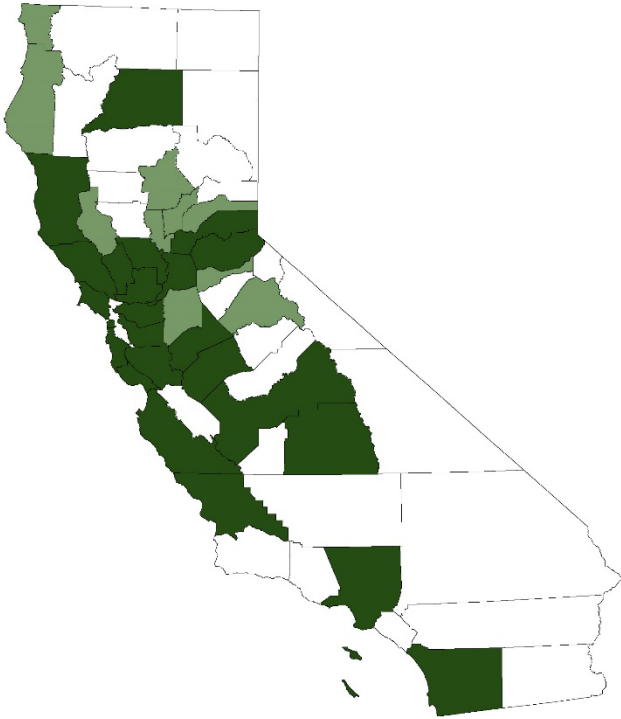

**Louisiana**

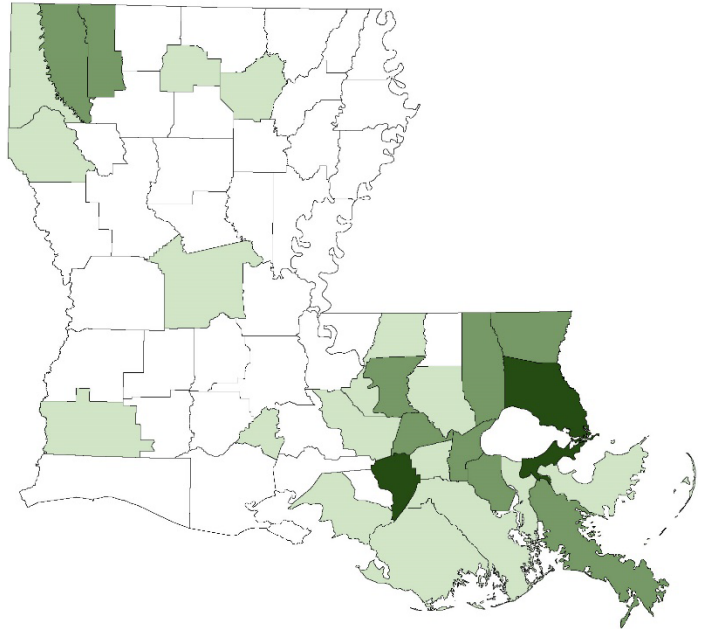

**Mississippi**

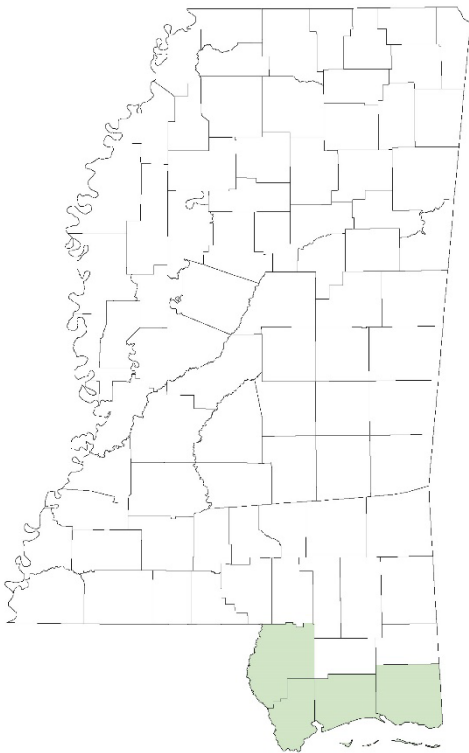

**New Jersey**

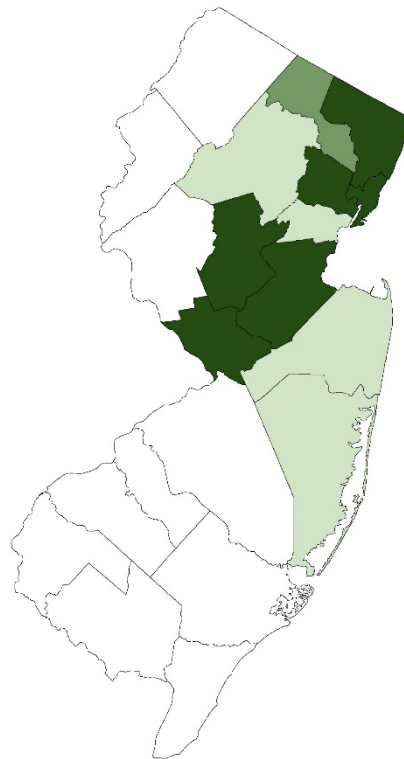

(continued on next page)

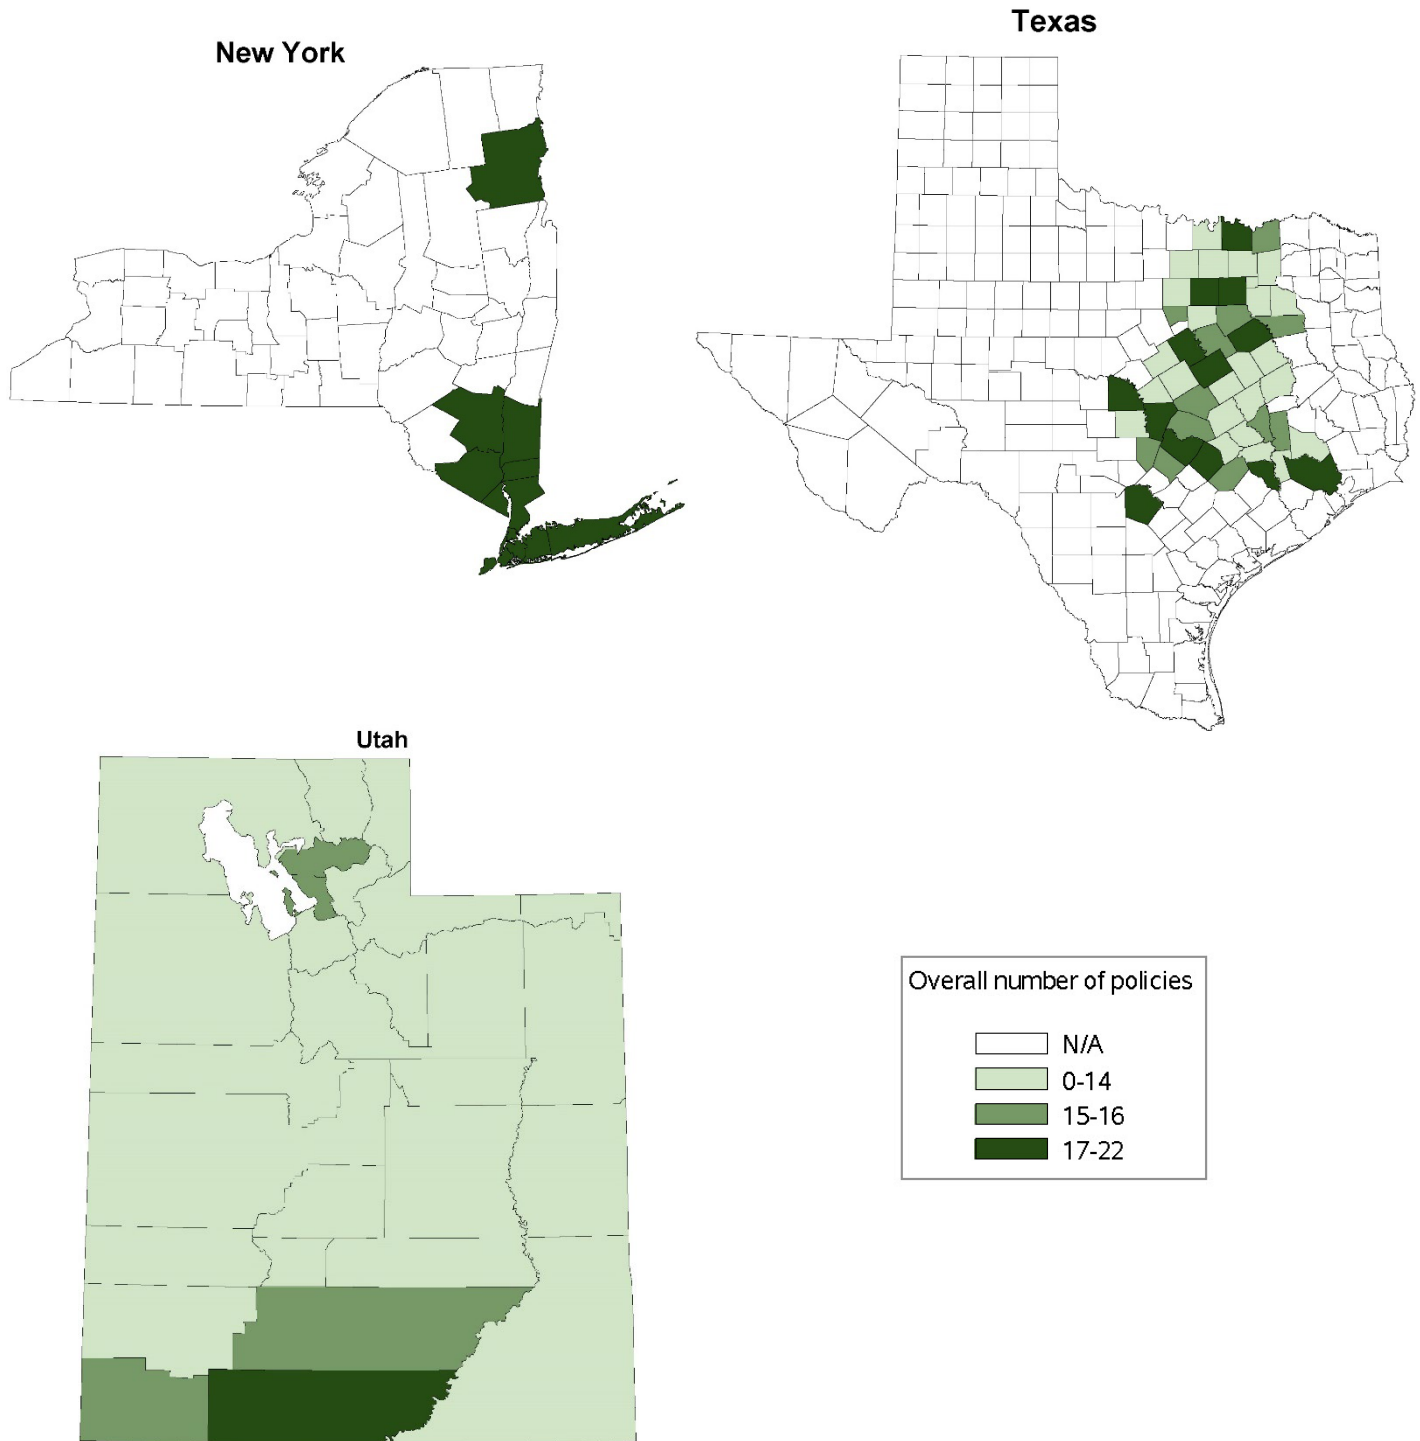

Note: N = 171 counties in 7 states. Categories were created by splitting number of policies per county by tertile. For counties with missing data on a given policy, data from state policies were not used to infer local county policies. This study focused on counties that corresponded to the places of residence for PCORnet and CCS patients, represented here in shades of green. Counties in white (“N/A”) were not included in the current study.

**Supplemental Figure 2. Distribution of Number of County Policies by State, Weighted by Policy Comprehensiveness (January-March 2021)**

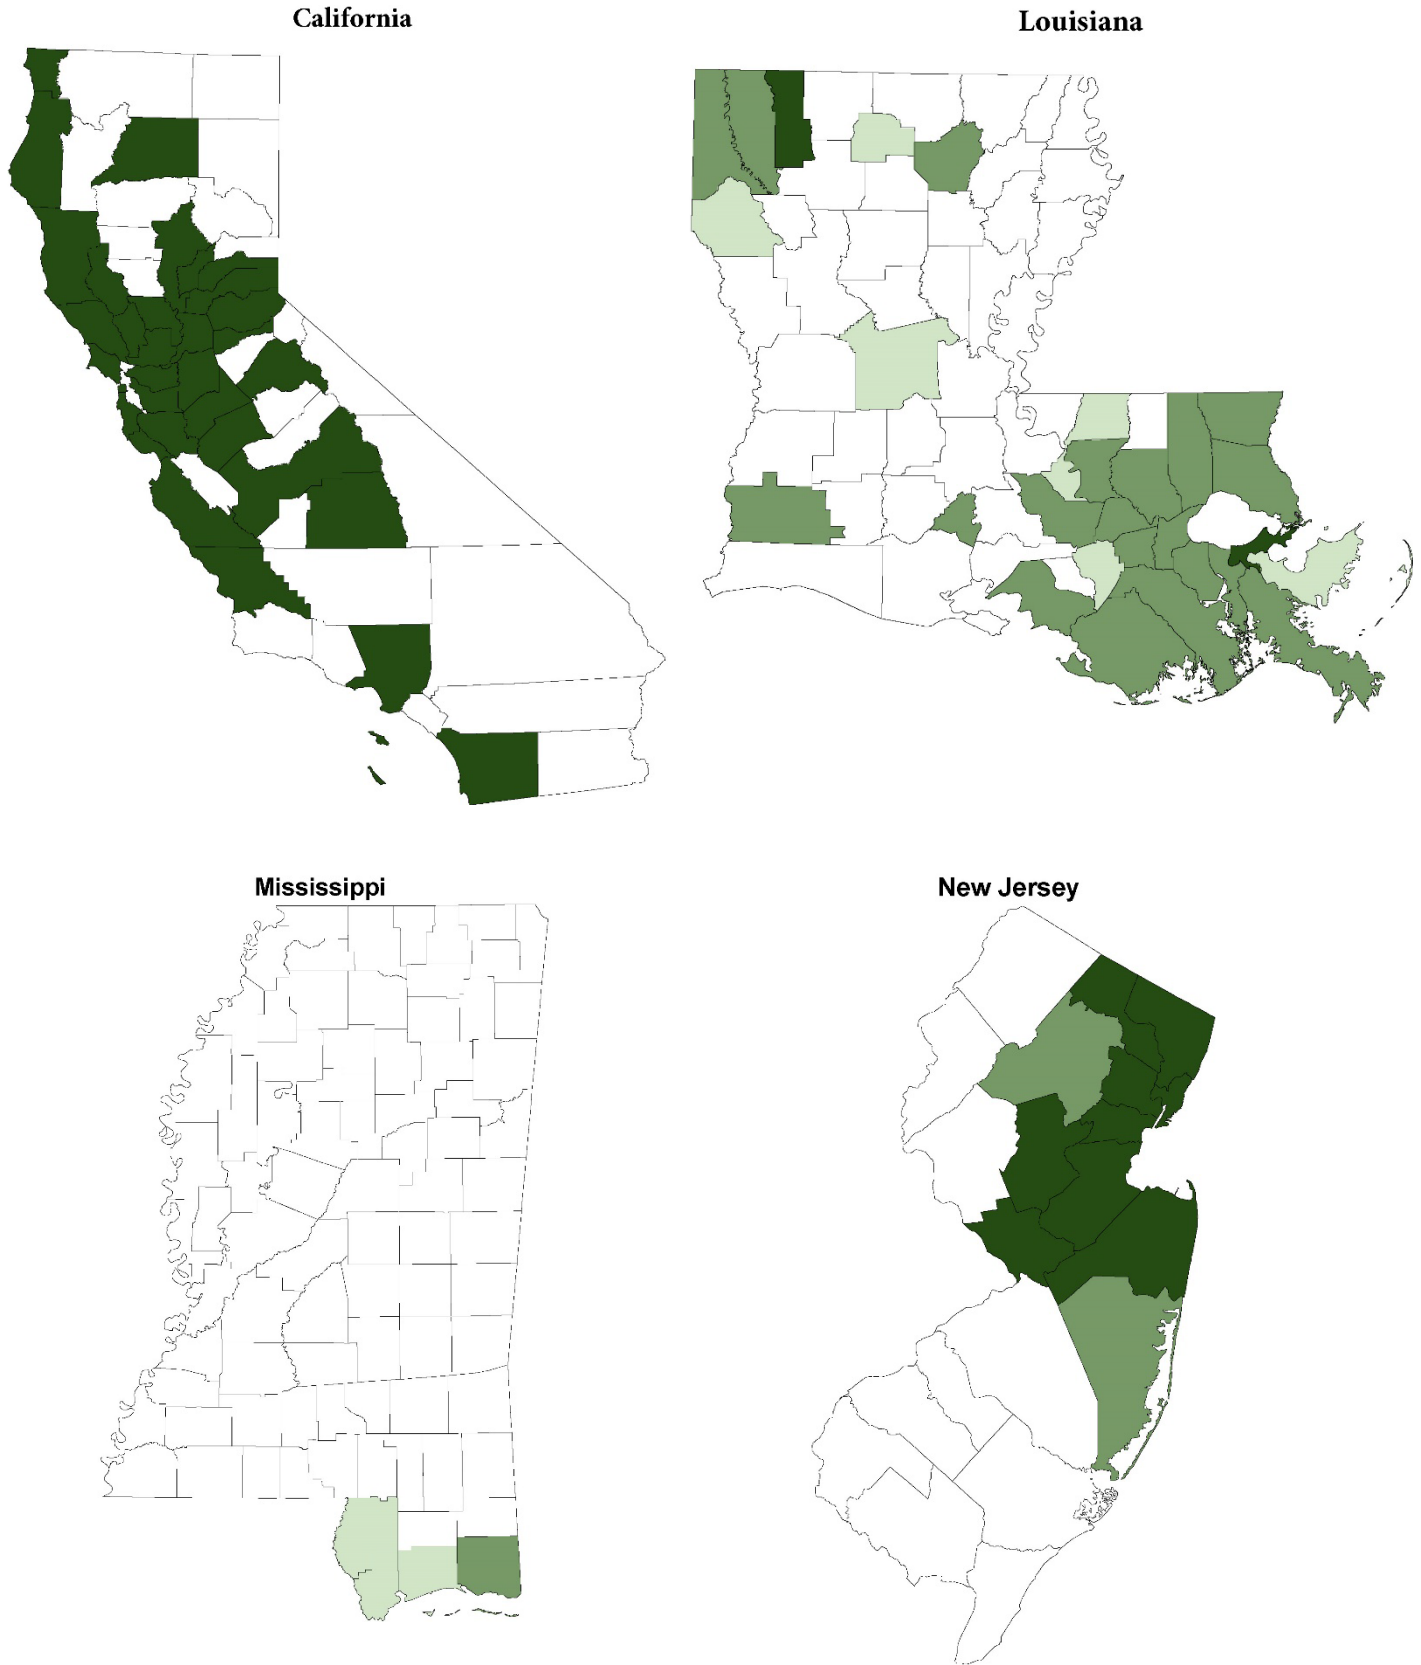

(continued on next page)

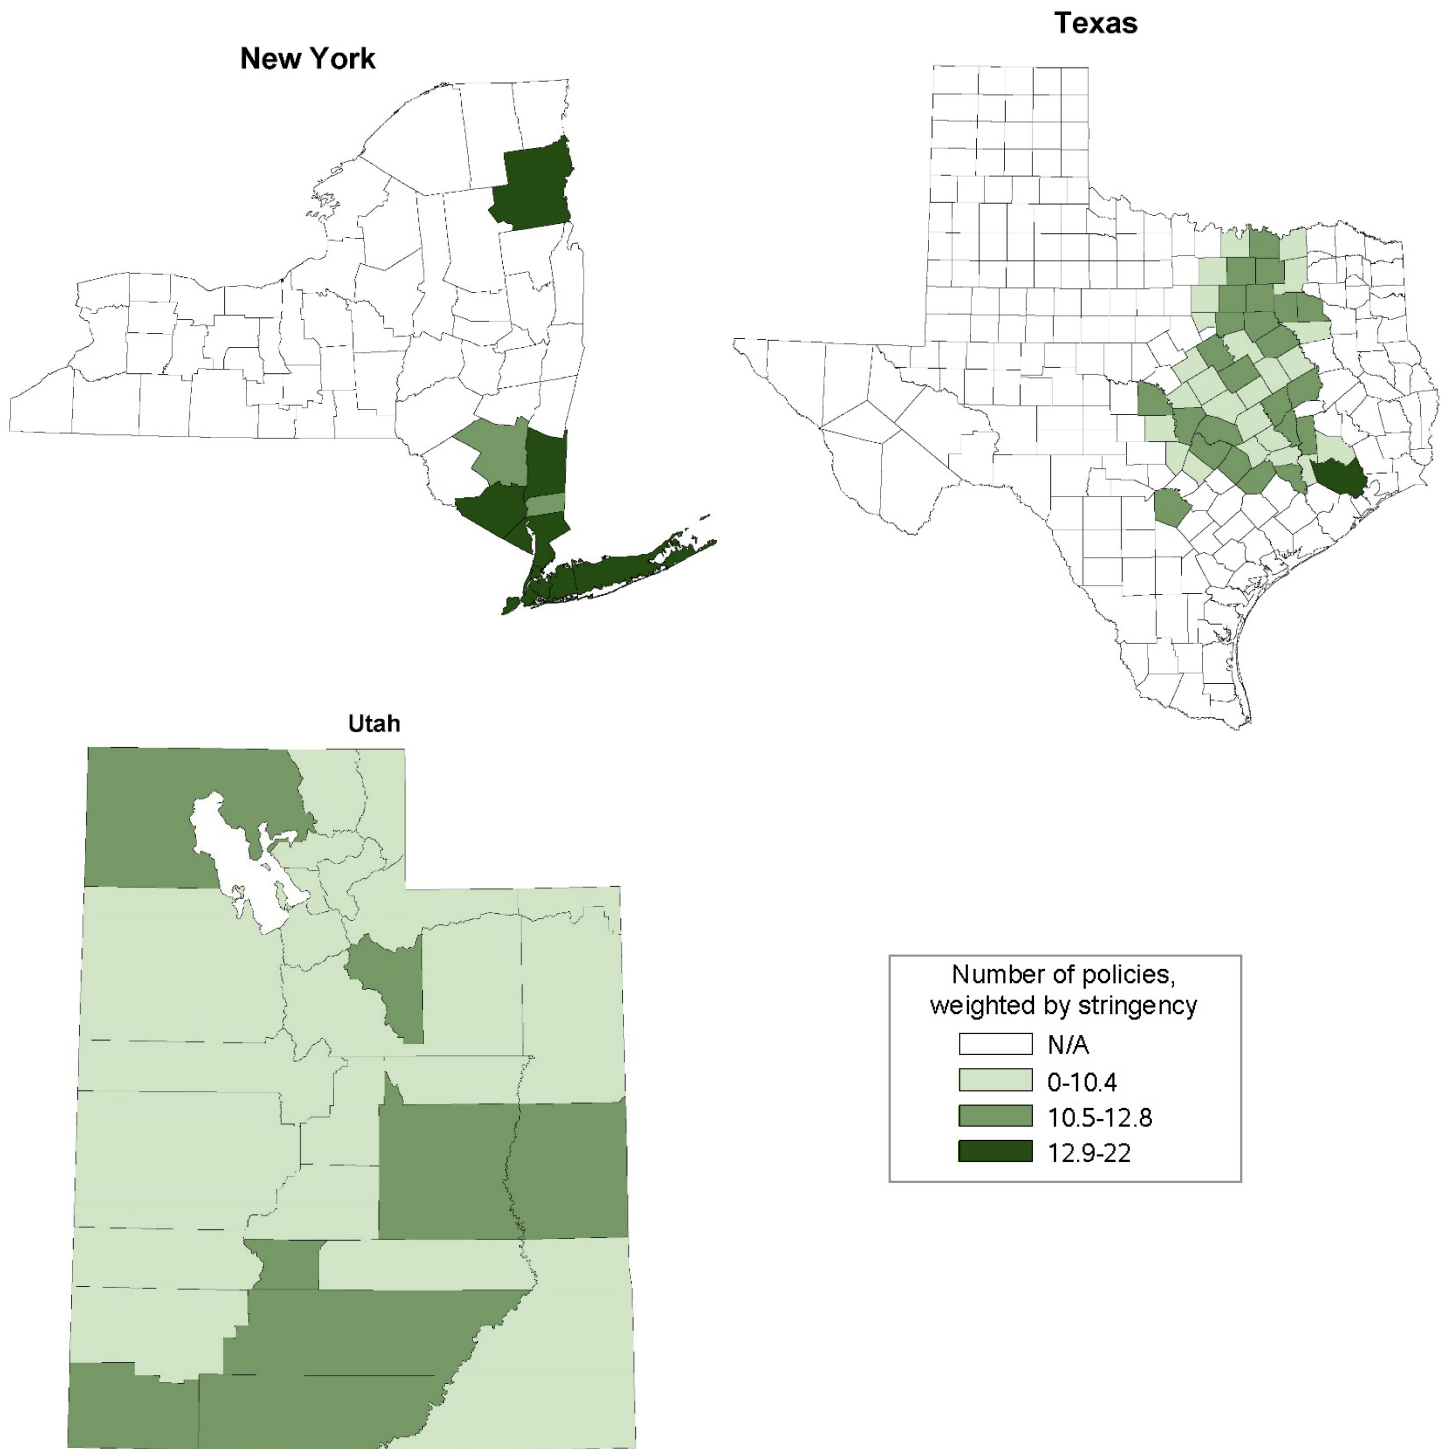

Note: N = 171 counties in 7 states. Categories were created by splitting number of policies per county by tertile. For counties with missing data on a given policy, data from state policies were used to infer local county policies. This study focused on counties that corresponded to the places of residence for PCORnet and CCS patients, represented here in shades of green. Counties in white (“N/A”) were not included in the current study.

**Supplemental Figure 3. Scree Plot of Eigenvalues After Polychoric Principal Component Analysis**

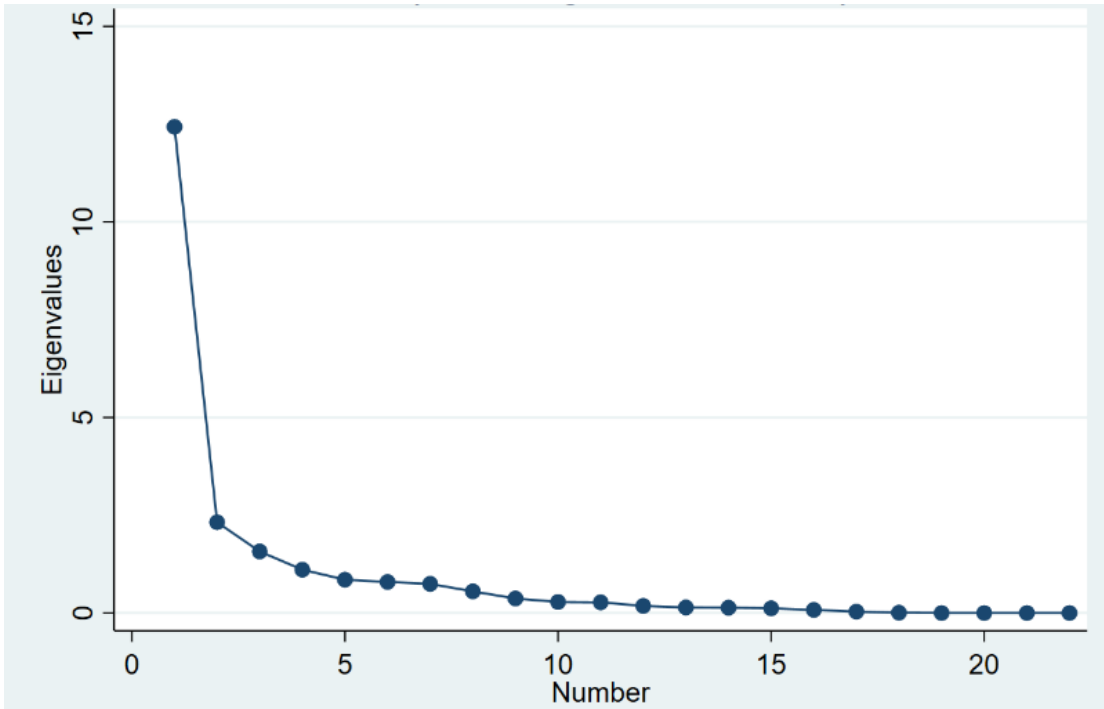

**Supplemental Figure 4a. Distribution of the First Principal Component (Entity Closure)**

**California**

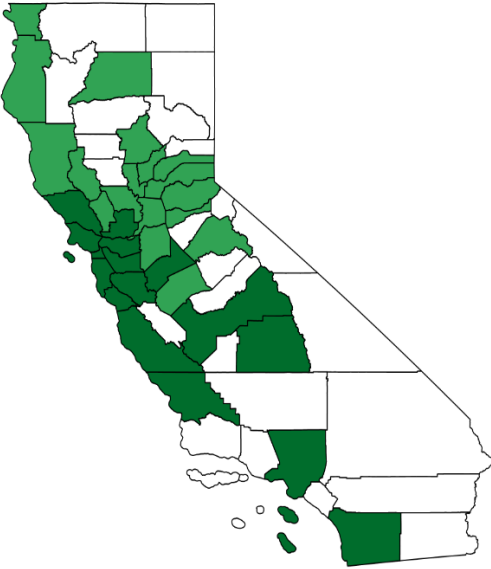

**Louisiana**

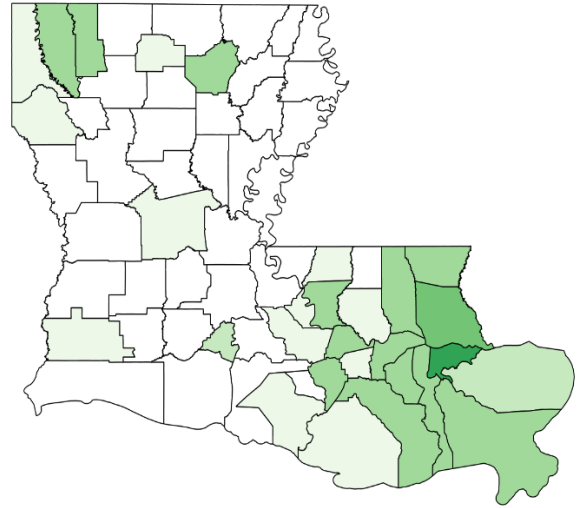

**Mississippi**

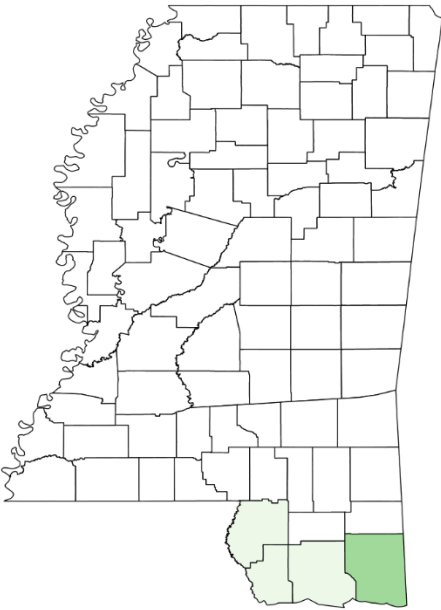

**New Jersey**

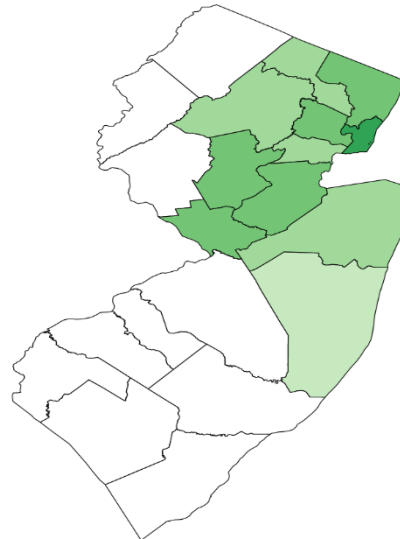

(continued on next page)

**New York**

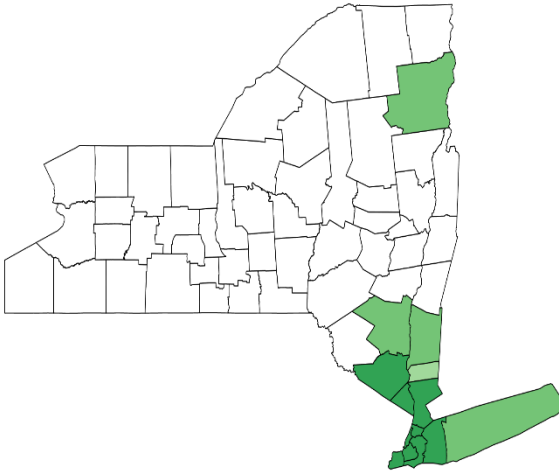

**Texas**

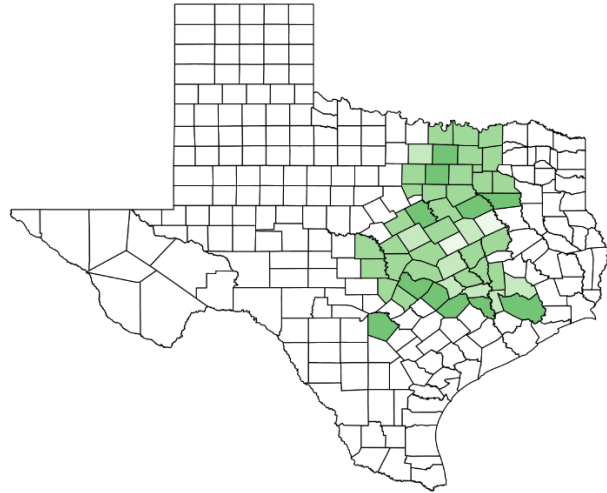

**Utah**

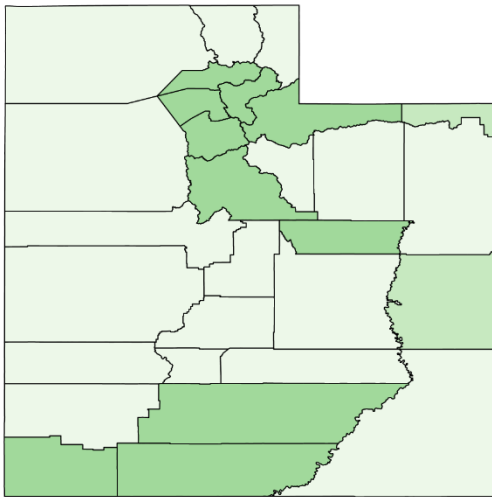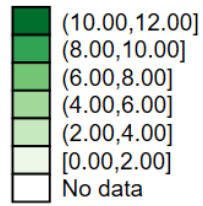

**Supplemental Figure 4b. Distribution of the Second Principal Component (Individual Restrictions)**

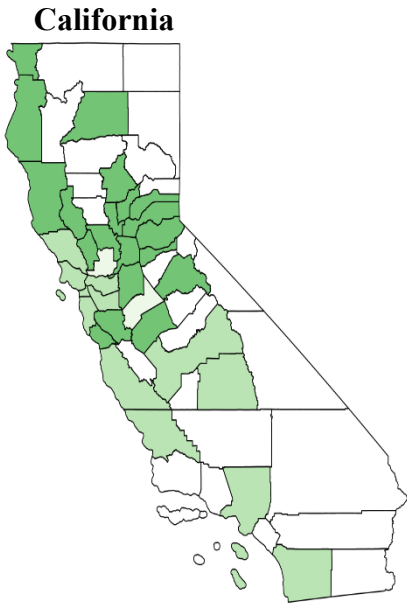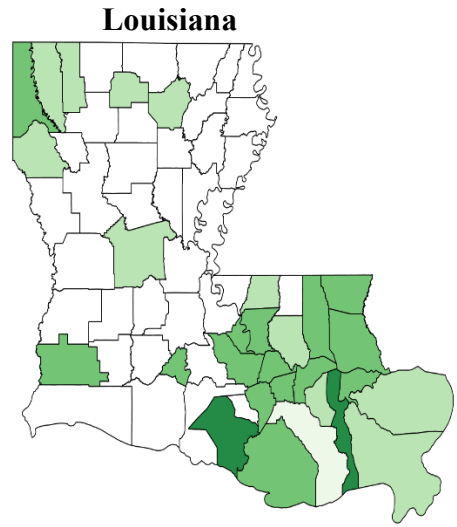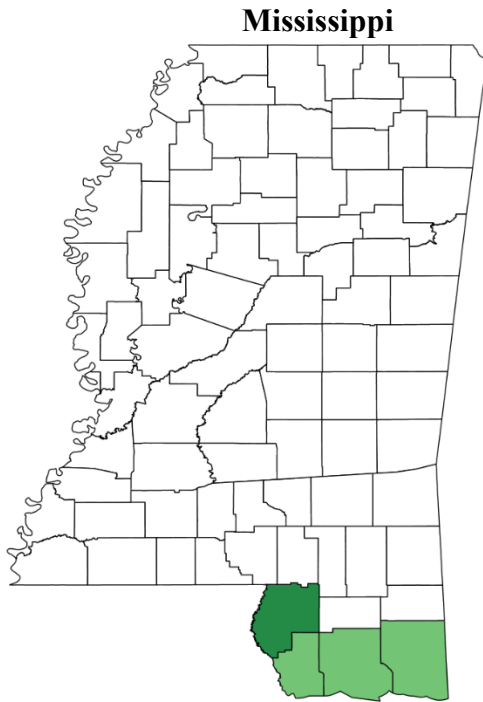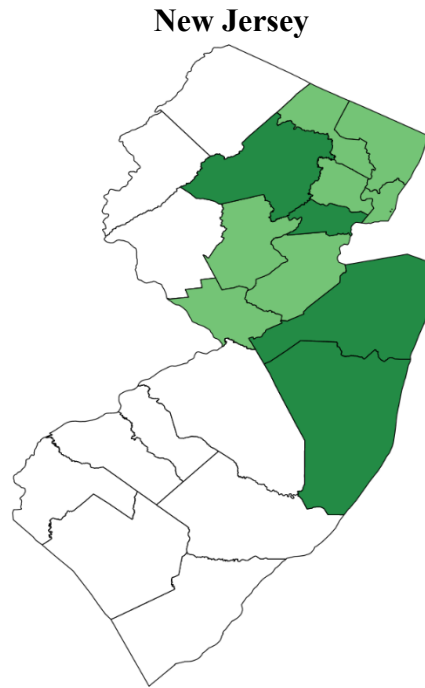

(continued on next page)



**New York**

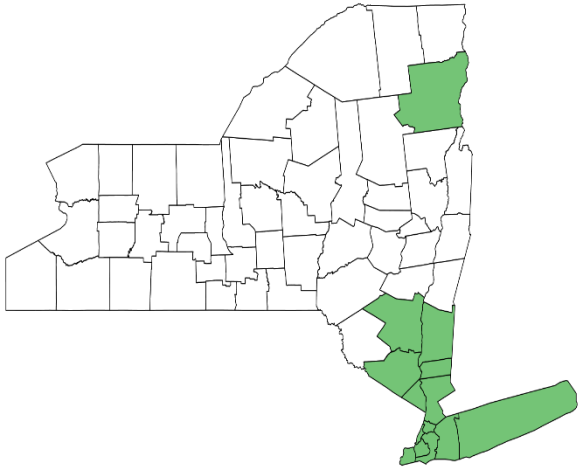

**Texas**

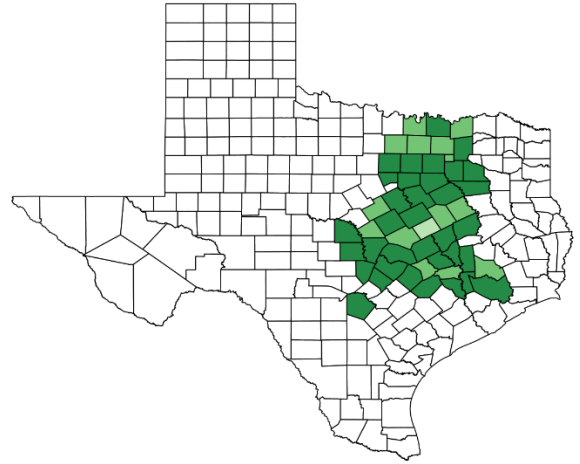

**Utah**

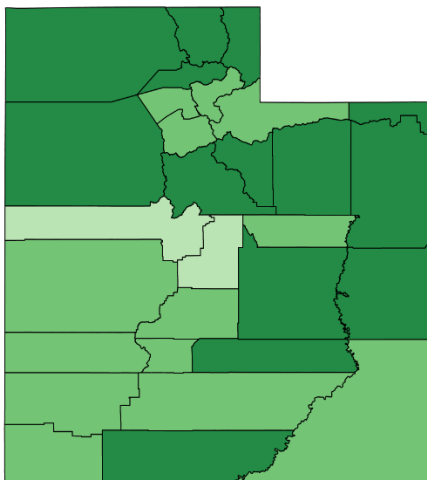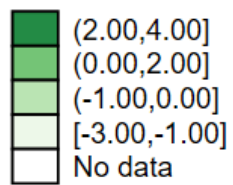

**Supplemental Figure 4c. Distribution of the Third Principal Component (State Funding)**

**California**

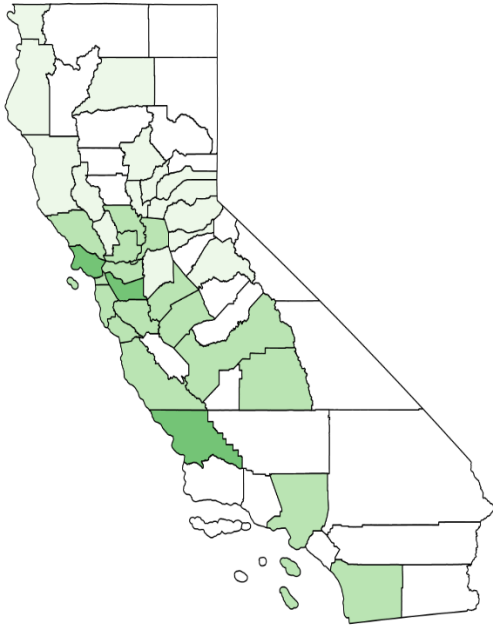

**Louisiana**

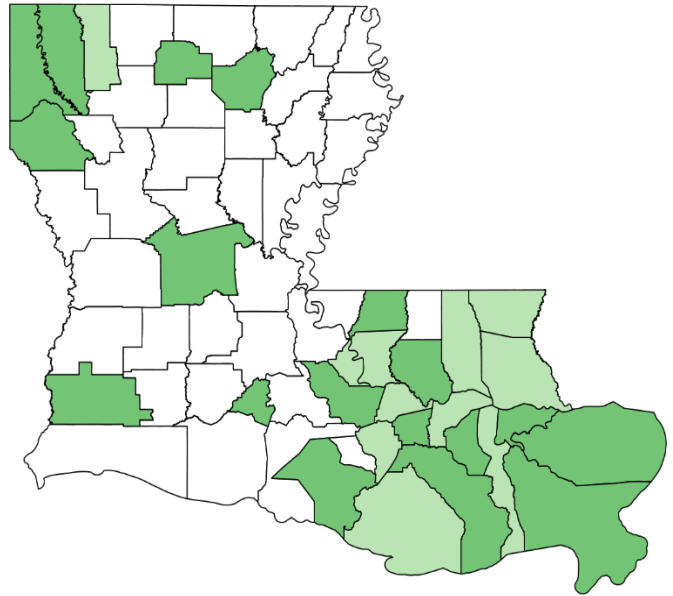

**Mississippi**

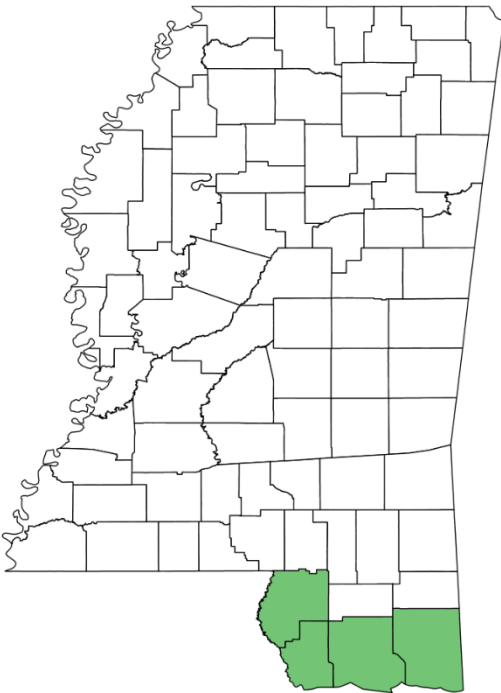

**New Jersey**

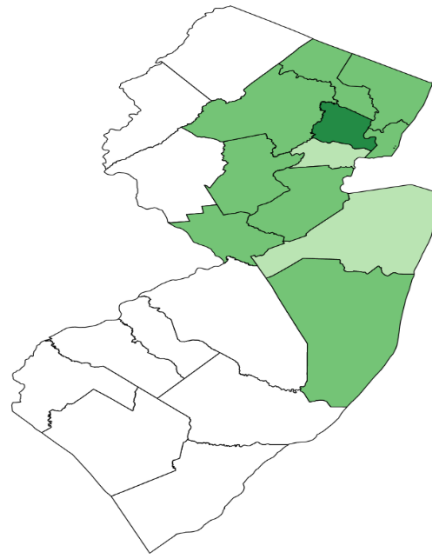

(continued on next page)

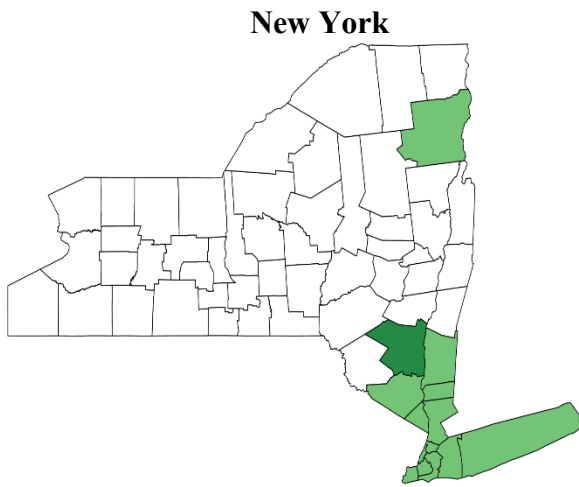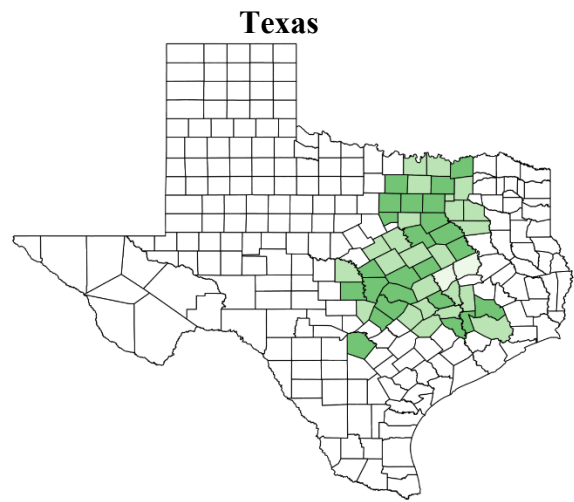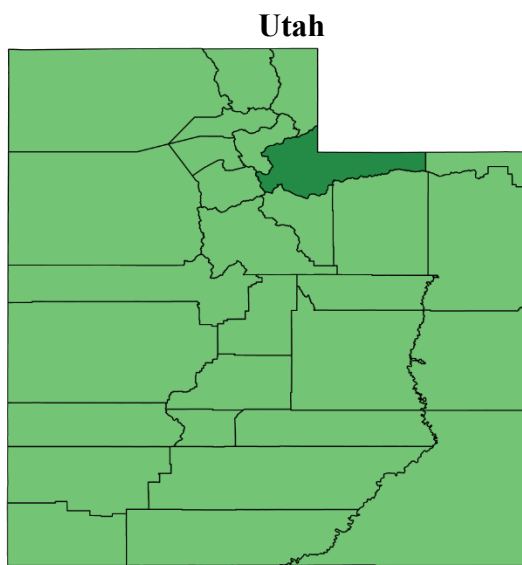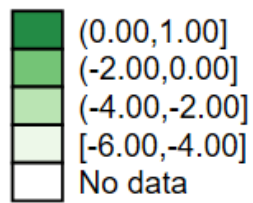

**Supplemental Figure 4d. Distribution of the Fourth Principal Component (Public Health Measures)**

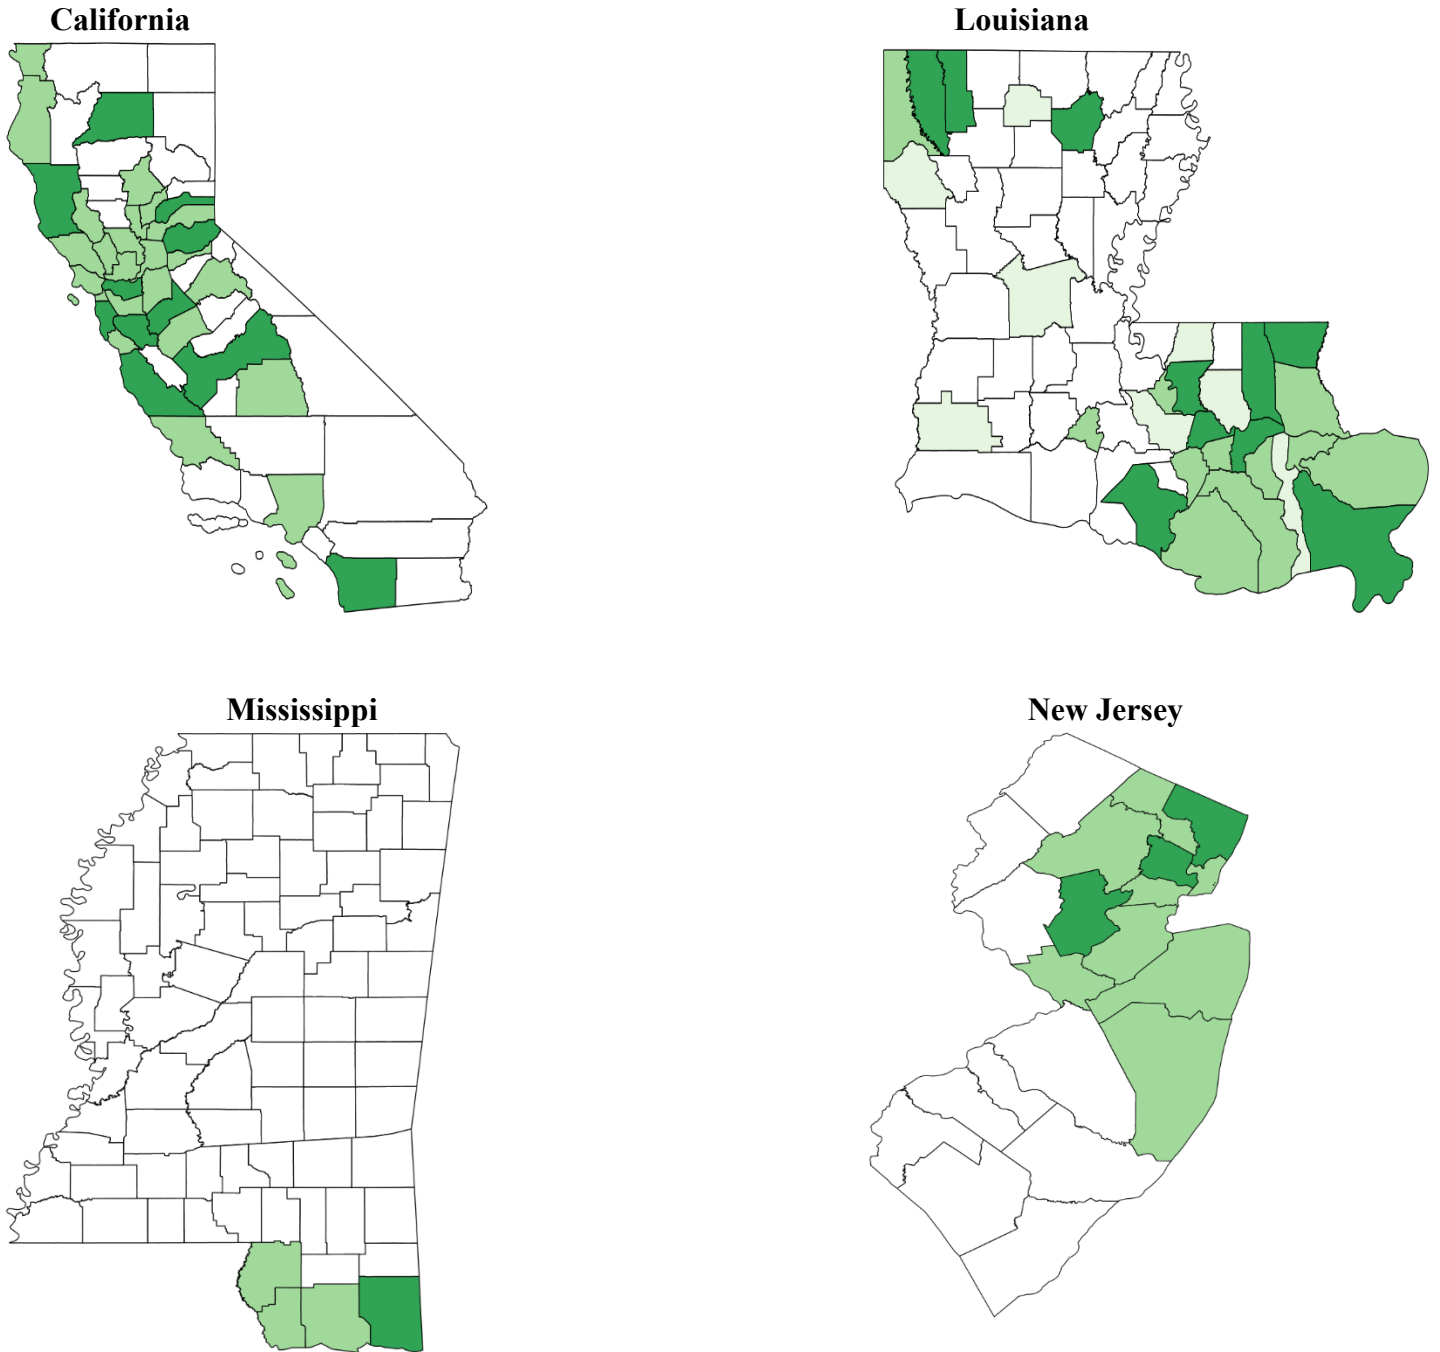

(continued on next page)

**New York**

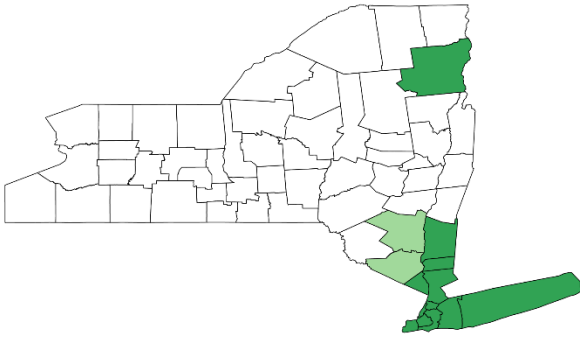

**Texas**

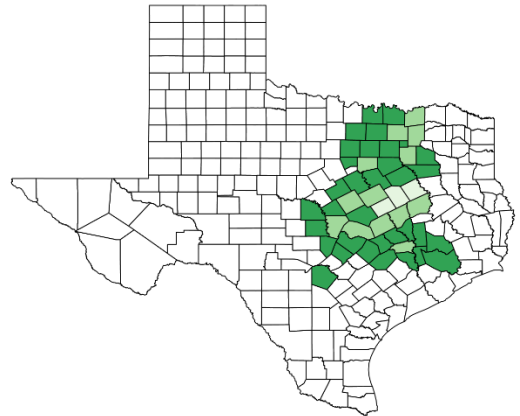

**Utah**

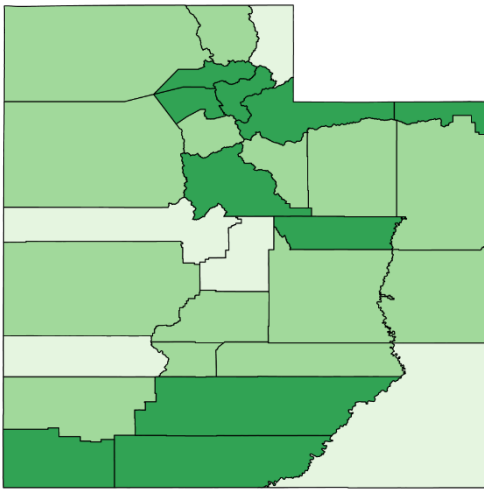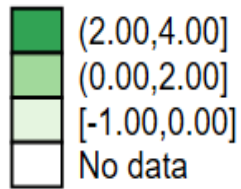

**Supplemental Figure 4e. Distribution of Composite Policy Index from Principal Component Analysis**

**California**

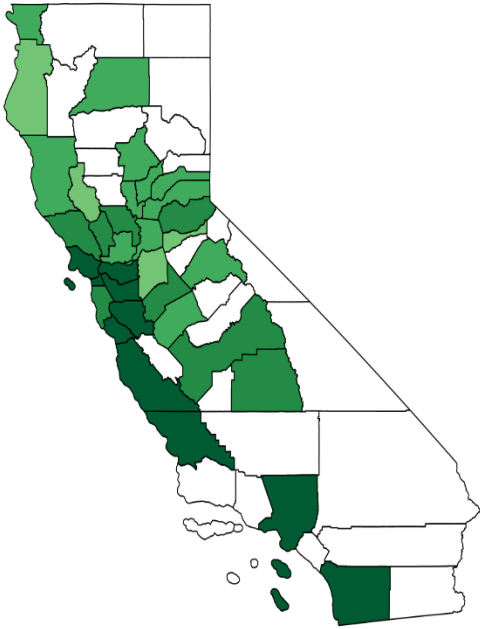

**Louisiana**

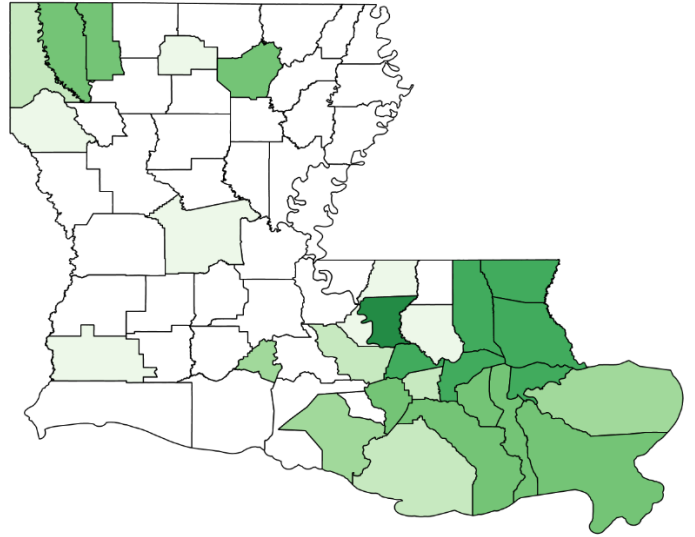

**Mississippi**

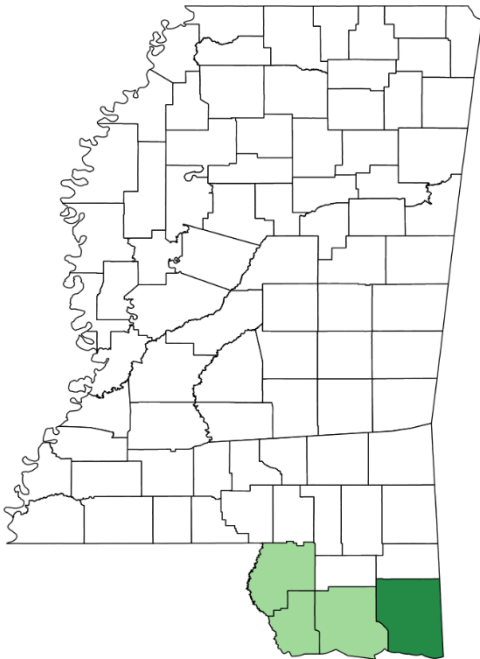

**New Jersey**

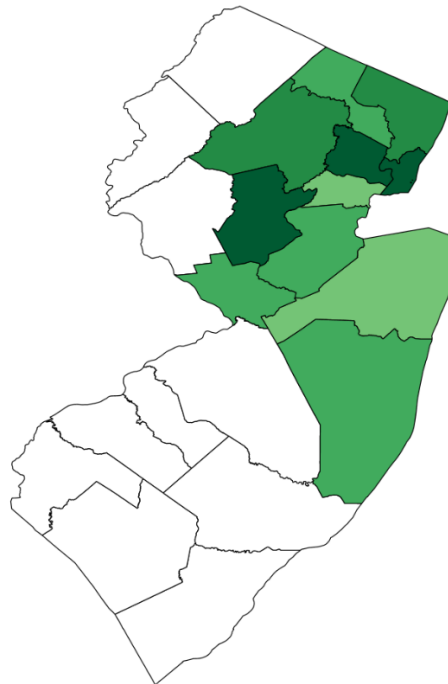

(continued on next page)

**New York**

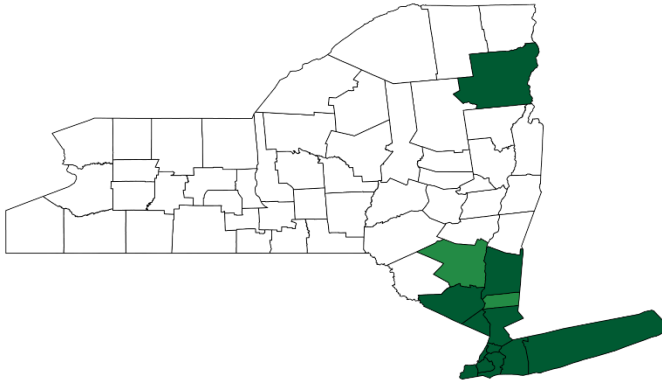

**Texas**

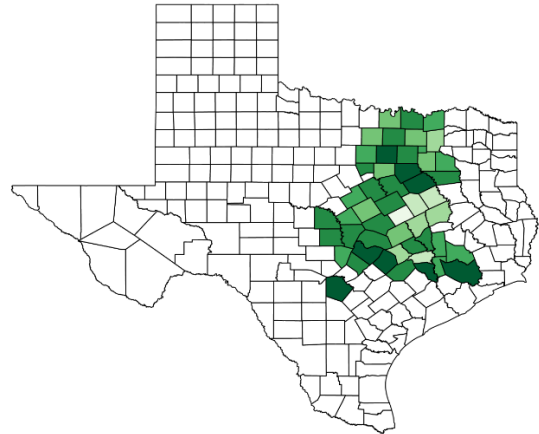

**Utah**

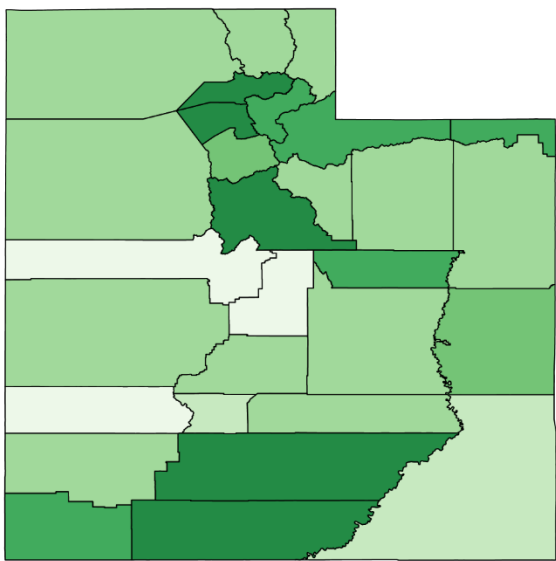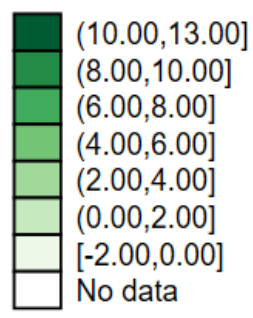

Supplement: MOESM1 [file 23587944]
